1

2

## Nutritional traits in the prodromal phase of Parkinson's disease

3

### in community-dwelling older adults in Japan

4

5

#### 6 **Authors**

7 Takashi Yamaguchi<sup>1</sup>, Ryota Nozaki<sup>1</sup>, Keita Taguchi<sup>1</sup>, Yoshio Suzuki<sup>1</sup>, Kai Takahashi<sup>1</sup>,

8 Kenta Takahashi<sup>1</sup>, Kazuhiro Iwaoka<sup>1</sup>, Yuriko Sato<sup>1</sup>, Takahiro Terauchi<sup>1</sup>, Hiroshi

9 Akasaka<sup>1</sup>, Naoki Ishizuka<sup>1</sup>, Kazuhiro Uchida<sup>2</sup>, Toshiharu Ninomiya<sup>3</sup>, Tetsuya Maeda<sup>1,\*</sup>

10

#### 11 **Affiliations**

12 <sup>1</sup>Division of Neurology and Gerontology, Department of Internal Medicine, School of

13 Medicine, Iwate Medical University, 1-1-1 Idaidori, Yahaba, Shiwa, Iwate, Japan

14 0283694

15 <sup>2</sup>Department of Health Promotion, School of Health and Nutrition Sciences, Nakamura-

16 Gakuen University, 5-7-1 Befu, Jonan-ku, Fukuoka, Japan 8140198

17 <sup>3</sup>Department of Epidemiology and Public Health, Graduate School of Medical Sciences,

18 Kyushu University, 3-1-1 Maidashi, Higashi-ku, Fukuoka, Japan 8128582

19

#### 20 **\*Corresponding author**

21 E-mail: [maeda@iwate-med.ac.jp](mailto:maeda@iwate-med.ac.jp)

22

## 24 **Abstract**

25           The growing aging population means that increasing numbers of people are  
26 living with Parkinson's disease (PD). Although dopamine replacement is effective,  
27 there are currently no curative or disease-modifying treatments. Nutrition is a well-  
28 known environmental risk factor of PD. This study aimed to clarify the relationship  
29 between nutritional traits and the prodromal phase of PD.

30           Subjects were enrolled from community-dwelling older adults. To identify  
31 individuals with prodromal PD (PPD), probability of PPD (PPP) and mild parkinsonian  
32 sign (MPS) assessments were used. Nutritional status was evaluated using a self-  
33 administered food frequency questionnaire form. Intakes of total energy, the three major  
34 nutrients (fat, protein, and carbohydrate), B vitamins, water, and dietary fiber were  
35 calculated. Nutrient intake in PPD was analyzed using analysis of covariance with age  
36 and sex as covariates.

37           We enrolled 305 subjects. The prevalence of older adults living with PPD was  
38 4.1% by  $PPP \geq 0.3$  and 21.0% by MPS criteria. Compared with subjects without PPD,  
39 individuals with  $PPP \geq 0.3$  had significantly higher fat intake ( $33.4 \pm 8.8$  vs.  $29.3 \pm 6.7$   
40 g/1000 kcal/day,  $p=0.037$ ) and lower carbohydrate intake ( $121.4 \pm 19.0$  vs.  $132.1 \pm 17.7$   
41 g/1000 kcal/day,  $p=0.039$ ), and MPS-positive subjects had significantly lower total  
42 energy intake ( $1817.5 \pm 384.7$  vs.  $1933.7 \pm 433.7$  kcal/day,  $p=0.012$ ).

43           In this community-based cross-sectional study, nutritional traits differed  
44 between older individuals with and without PPD; these differences were more

45 pronounced when the PPP was used to evaluate PPD. Nutrition and diet may thus  
46 modify PD incidence.

## 47 **Introduction**

48         Parkinson's disease (PD) is a common neurodegenerative disease in older adults.  
49 In the early clinical phase, it is characterized by cardinal movement features such as  
50 bradykinesia, rest tremor, and rigidity. Because of the growing aging population  
51 worldwide, the number of people living with PD is increasing every year [1]; this global  
52 trend has been described as a “pandemic” [2]. Advances in symptomatic treatments  
53 based on dopamine replacement have contributed to reducing the mortality rate in PD;  
54 however, no curative or disease-modifying treatments have yet been developed [3,4].  
55 Reducing the risk of PD development and preventing its onset is therefore desirable.  
56 Motor symptoms reportedly manifest when around 40% of dopamine neurons in the  
57 substantia nigra pars compacta have been lost [5]. When motor symptoms are  
58 recognized, PD is thus around the middle of its clinical course. However, PD can also  
59 present variable non-motor symptoms such as autonomic dysfunction, mood disorders,  
60 olfactory impairment, and cognitive decline. These non-motor symptoms occur prior to  
61 movement symptoms, and some are regarded as prodromes of PD, with relatively high  
62 levels of evidence. People who are living with prodromes only are defined as having  
63 prodromal PD (PPD).

64         Multiple environmental factors are reportedly associated with PD development.  
65 Of these, nutrition and diet are well known [6]. Moreover, nutritional habits over the  
66 years are modifiable risk factors for many chronic diseases that deteriorate quality of

67 life in both young and older adults. Although many food-derived nutrients and variable  
68 dietary patterns are associated with PD development and modification [7], the  
69 characteristics of nutrition and diet have not yet been adequately studied in PPD. It has  
70 been reported that nutritional characteristics of the Mediterranean diet may be  
71 associated with PPD and PD incidence as well as the probability of PPD (PPP) in older  
72 adults in the Mediterranean [8]; a study of the nutritional and dietary characteristics of  
73 community-dwelling older adults may thus help to elucidate the nutritional risk factors  
74 associated with developing PD. Important findings have also been accumulated from  
75 the aspect of nutritional absorption. Vagotomy [9] is reportedly a negative risk factor  
76 for PD, whereas inflammatory bowel disease [10] is a positive risk factor. Additionally,  
77 the specific characteristics of gut microbiota in PD [11] and PD with motor  
78 complications [12] are now clear. Nutrient absorption is therefore expected to continue  
79 to attract interest in relation to nutrition and diet research.

80 To detect PPD for research purposes, the PPD research criteria (PPC) was  
81 established by the International Parkinson and Movement Disorder Society (MDS) [13].  
82 These criteria encompass various markers that are recognized risk factors of PD. Mild  
83 parkinsonian sign (MPS) is another prodromal criteria for detecting subtle parkinsonism  
84 that does not meet the diagnostic criteria for PD. MPS has also been used to detect PPD  
85 [14,15], and is associated not only with PD development, but also with mortality, aging,  
86 dementia, and vascular risk [16].

87 In the present study, we aimed to clarify the relationship between nutritional  
88 status and PPD in community-dwelling older adults.

89

## 90 **Methods**

### 91 **Subjects**

92 We enrolled subjects from the Yahaba Active Aging and Healthy Brain  
93 (YAHABA) study, which has a register of community-dwelling older adults aged 65  
94 years or older. The study details have been described previously [17]. According to the  
95 study protocol [18], educational history, past and present history of illness, smoking  
96 habits, alcohol consumption, and activities of daily living were comprehensively  
97 collected, and physical examinations, neuropsychological and biochemical tests, and  
98 radiological examinations were performed in all subjects. Those diagnosed with  
99 dementia, PD, or serious systemic diseases were excluded.

100

### 101 **Detection of PPD**

102 We detected PPD using two criteria. First, as in our previous study, PD  
103 prodromes were assessed using the PPD self-administered questionnaire (PPQ) and the  
104 PPP was calculated [17]. Briefly, the PPQ consists of 21 items that are based on the  
105 PPC, including regular pesticide exposure, occupational solvent exposure, non-use of  
106 caffeine, current smoking, never smoking, former smoking, first-degree relative with  
107 PD, history of type 2 diabetes mellitus, physical inactivity, history of low plasma urate  
108 level, daytime somnolence, hyposmia, constipation, urinary dysfunction, impotence for  
109 males, neurogenic orthostatic hypotension, symptomatic orthostatic hypotension,  
110 depressive mood, and global cognitive deficit. Some items in the PPC are difficult to  
111 determine by self-administration; we therefore defined rapid eye movement sleep

112 behavior disorder as the presence of both speech and limb movement during sleep.  
113 Ultrasound echogenicity findings of the substantia nigra, dopaminergic positron  
114 emission tomography/single-photon emission computed tomography findings, gene  
115 testing, and motor markers were excluded. The PPP was calculated using the PPD  
116 calculator supplied to MDS members as an online program on the MDS website. We  
117 defined PPD in the current study as  $PPP \geq 0.3$ , in accordance with the MDS declaration  
118 of research operating policy. The PPQ has been used in a previous retrospective study  
119 of pre-onset subjective symptoms in people living with PD, in which prodromes were  
120 experienced at an epidemiologically valid frequency [19].

121 Second, we evaluated MPS [20] as the other criteria for PPD. MPS comprises  
122 items of speech, facial expression, rest tremor (rated separately in the lower jaw, right  
123 arm, left arm, right leg, and left leg), rigidity (rated separately in the neck, right arm, left  
124 arm, right leg, and left leg), standing posture, and general bradykinesia. For MPS, a  
125 neurologist performed a neurological examination and rated each item from 0 (none) to  
126 4 (severe). MPS positivity was defined when any one of the following criteria was  
127 satisfied: (1) at least two items with scores  $\geq 1$ , (2) at least one item with a score  $\geq 2$ , or  
128 (3) at least one item of rest tremor with a score  $\geq 1$ .

129

## 130 **Nutritional status**

131 We assessed nutritional status using a self-administered food frequency  
132 questionnaire (FFQ) form according to a previous protocol [18]. This questionnaire is a  
133 booklet-type form with illustrations and photographs of portion sizes and is easy for

134 older adults to complete. Support from family members was acceptable, and cohort staff  
135 who were independent of the study checked for discrepancies and missing values. The  
136 FFQ assesses the consumption frequency of 233 foods, food groups, or beverages  
137 during the preceding month, and can evaluate the intake of 23 food groups and 160  
138 nutrients. In the present study, we analyzed the intakes of total energy, the three major  
139 nutrients (fat, protein, and carbohydrate), some vitamins (B1, B2, B6, and B12), water  
140 derived from food, and dietary fiber. Total energy intake was examined in terms of the  
141 bare minimum; other intakes were examined using the residue method.

142         A validation study of this FFQ has been conducted in 60 residents (aged 65  
143 years or older) of Hisayama, located on Kyushu island in Japan, who participated in an  
144 annual health checkup in 2019 and consented to participate in this study. Dietary  
145 surveys were performed using a weighing and dietary recording method for 4  
146 consecutive days (3 weekdays + 1 weekend day) for a total of 16 days over four seasons  
147 (November–December 2019, February–March 2020, May–June 2020, and August–  
148 September 2020). Subjects first completed the FFQ at a health center or at home. They  
149 were then provided with the dietary recording form, recording manual, digital weighing  
150 scale, measuring spoons, a camera photography scale (a standard graphic tool used in  
151 the National Health and Nutrition Survey), and an instant camera (if unable to take  
152 pictures on a device such as a mobile or smartphone). Nutritional values were calculated  
153 according to the Japanese Standard Tables of Food Composition 2015 (7th revision)  
154 [21]. The validity of each food and nutrient intake calculated from the FFQ was  
155 compared with that calculated from the dietary surveys (the average intake of each  
156 food/nutrient from the 16-day period over four seasons) using Pearson’s correlation

157 coefficients. The results were as follows: 0.66 for total energy, 0.59 for fat, 0.61 for  
158 protein, 0.49 for carbohydrate, 0.56 for vitamin B1, 0.59 for vitamin B2, 0.37 for  
159 vitamin B6, 0.31 for vitamin B12, 0.47 for water derived from food, and 0.66 for dietary  
160 fiber (all  $p < 0.01$ ). Information regarding these data is presented briefly on the JPSC-AD  
161 website (<https://www.eph.med.kyushu-u.ac.jp/jpsc/link/pdf/ffq02.pdf>). In addition, the  
162 relevant manuscript of this validation study is currently in preparation.

163

## 164 **Statistical analysis**

165 We calculated the bivariate associations of PPP and MPS with the clinical  
166 backgrounds of subjects using the Mann–Whitney U test for nonparametric variables  
167 and chi-squared or Fisher’s exact tests for categorical variables. We evaluated the  
168 relationship between PPD (i.e.,  $PPP \geq 0.3$  or MPS positivity) and nutrients using an  
169 analysis of covariance, with age, sex, and constipation added as covariates. In the  
170 current study, sex was taken to mean the sex assigned at birth. P-values  $< 0.05$  were  
171 considered significant. All analyses were performed using IBM SPSS Statistics for  
172 Windows (version 23.0; IBM Corp., Armonk, NY, USA).

173

## 174 **Ethical approval**

175 All investigators conducted this study in accordance with the Declaration of  
176 Helsinki. The research protocol was approved by the Ethics Committee of Iwate  
177 Medical University (HGH28-12, HG2020-017) and was performed with written  
178 informed consent from all subjects.



179

## 180 **Results**

### 181 **Subject demographics**

182           We targeted 962 older adults who were registered in the YAHABA study.  
183 Responses to the PPQ were obtained from 715 subjects and MPS scores were obtained  
184 from 345 subjects. We finally enrolled 305 subjects in the study, for whom both PPQ  
185 and MPS data were available. Table 1 shows the background demographics of subjects.  
186 The prevalence of older adults living with PPD was 3.9% using  $PPP \geq 0.3$  and 21.0%  
187 using MPS criteria (i.e., prevalence was around five times higher with MPS criteria than  
188 with  $PPP \geq 0.3$ ). In subjects with  $PPP \geq 0.3$ , Geriatric Depression Scale scores were  
189 significantly higher than in subjects with  $PPP < 0.3$  ( $6.67 \pm 4.10$  vs.  $3.24 \pm 2.97$ ,  
190  $p=0.02$ ). Furthermore, MPS-positive subjects were significantly older ( $78.7 \pm 6.2$  vs.  
191  $76.2 \pm 5.1$  years,  $p=0.004$ ) and had higher Geriatric Depression Scale scores ( $4.70 \pm$   
192  $3.35$  vs.  $3.05 \pm 2.93$ ,  $p=0.004$ ) than MPS-negative subjects. Sex; medical histories of  
193 stroke, myocardial infarction, and type 2 diabetes mellitus; Mini-Mental State  
194 Examination score; body mass index; and walking speed were not significantly  
195 associated with PPP or MPS scores. The scores and frequencies for each of the MPS  
196 subitems are shown in Table 2. In the community-dwelling older adults enrolled in the  
197 present study, posture and rigidity had relatively high scores and frequencies, whereas  
198 tremor had relatively low scores and frequencies.

199

200

201

202 **Table 1. Subjects' demographics**

|                                   | All<br>(N = 305) | Prodromal PD<br>probability |                  | Mild parkinsonian sign |                     |
|-----------------------------------|------------------|-----------------------------|------------------|------------------------|---------------------|
|                                   |                  | ≥ 0.3<br>(N=12)             | < 0.3<br>(N=293) | Positive<br>(N=64)     | Negative<br>(N=241) |
| Sex, male:female, n               | 140:165          | 5:7                         | 134:159          | 34:30                  | 106:105             |
| Age, mean ± SD,<br>years          | 76.93 ±<br>5.60  | 76.67 ±<br>6.42             | 76.69 ±<br>5.35  | 78.64 ±<br>6.20*       | 76.24 ±<br>5.05     |
| Stroke, n (%)                     | 25 (8.2)         | 2 (16.7)                    | 23 (7.8)         | 8 (12.5)               | 17 (7.1)            |
| Malignant<br>neoplasm, n (%)      | 54 (17.7)        | 1 (8.3)                     | 53 (18.1)        | 13 (20.3)              | 41 (17.0)           |
| Diabetes mellitus, n<br>(%)       | 54 (17.7)        | 4 (33.3)                    | 50 (17.1)        | 10 (15.6)              | 44 (18.3)           |
| GDS, mean ± SD                    | 3.40 ±<br>3.09   | 6.67±<br>4.10*              | 3.24 ±<br>2.97   | 4.70 ±<br>3.35**       | 3.05 ±<br>2.93      |
| MMSE, mean ± SD                   | 28.13 ±<br>2.47  | 28.42 ±<br>2.50             | 28.10 ±<br>2.56  | 27.73 ±<br>2.65        | 28.24 ±<br>2.41     |
| BMI, mean ± SD                    | 24.28 ±<br>3.48  | 23.89 ±<br>2.83             | 24.17 ±<br>3.88  | 23.98 ±<br>4.22        | 24.23 ±<br>3.75     |
| Walking speed,<br>mean ± SD, s/5m | 4.56 ±<br>1.10   | 5.15 ±<br>1.27              | 4.54 ±<br>1.09   | 4.87 ±<br>1.57         | 4.48 ±<br>0.94      |

203 N & n, number; SD, standard deviation; GDS, geriatric depression scale; MMSE, mini  
204 mental examination; BMI, body mass index; \*, p<0.05; \*\*, p<0.01.

205

206 **Table 2. Score of mild parkinsonian sign in this study older population**

|                          |           | Score      |           |         |         |         |
|--------------------------|-----------|------------|-----------|---------|---------|---------|
|                          |           | 0          | 1         | 2       | 3       | 4       |
| Speech, n (%)            |           | 295 (96.8) | 8 (2.6)   | 2 (0.6) | 0       | 0       |
| Facial expression, n (%) |           | 289 (94.5) | 13 (4.5)  | 3 (1.0) | 0       | 0       |
| Posture, n (%)           |           | 263 (86.4) | 30 (9.7)  | 6 (1.9) | 4 (1.3) | 1 (0.3) |
| Bradykinesia, n (%)      |           | 286 (93.8) | 13 (4.2)  | 5 (1.6) | 0       | 0       |
| Rigidity, n<br>(%)       | neck      | 297 (97.4) | 6 (1.9)   | 2 (0.6) | 0       | 0       |
|                          | right arm | 265 (87.0) | 34 (11.0) | 6 (1.9) | 0       | 0       |
|                          | left arm  | 268 (87.7) | 30 (9.7)  | 4 (1.3) | 2 (0.6) | 1 (0.3) |
|                          | right leg | 283 (92.5) | 18 (5.8)  | 4 (1.3) | 0       | 0       |

|                       |           |            |          |         |         |   |
|-----------------------|-----------|------------|----------|---------|---------|---|
|                       | left leg  | 283 (92.5) | 15 (4.9) | 5 (1.6) | 2 (0.6) | 0 |
| Resting tremor, n (%) | Jaw       | 305 (100)  | 0        | 0       | 0       | 0 |
|                       | right arm | 301 (98.4) | 4 (1.3)  | 0       | 0       | 0 |
|                       | left arm  | 300 (98.1) | 5 (1.6)  | 0       | 0       | 0 |
|                       | right leg | 305 (100)  | 0        | 0       | 0       | 0 |
|                       | left leg  | 305 (100)  | 0        | 0       | 0       | 0 |

207 n, number.

208

209 **Differences in nutritional status between PPD defined by PPP**  
 210 **and MPS**

211 In Table 3, nutritional status adjusted for age and sex is classified by PPP  $\geq 0.3$   
 212 or  $< 0.3$  and MPS positivity or negativity. Subjects with PPP  $\geq 0.3$  had no difference in  
 213 total energy intake compared with those with PPP  $< 0.3$ ; however, MPS-positive  
 214 subjects had significantly lower total energy intake than MPS-negative subjects ( $1817.5$   
 215  $\pm 384.7$  vs.  $1933.7 \pm 433.7$  kcal/day,  $p=0.012$ ). Analysis of the three major nutrients  
 216 showed significantly higher fat intake ( $33.4 \pm 8.8$  vs.  $29.3 \pm 6.7$  g/1000 kcal/day,  
 217  $p=0.037$ ) and lower carbohydrate intake ( $121.4 \pm 19.0$  vs.  $132.1 \pm 17.7$  g/1000 kcal/day,  
 218  $p=0.039$ ) in subjects with PPP  $\geq 0.3$  than in those with PPP  $< 0.3$ . There were no  
 219 differences in the intakes of the three major nutrients between subjects with positive and  
 220 negative MPS. Intake of B vitamins was not different between subjects living with and  
 221 without PPD, evaluated using either the PPP or MPS criteria. Water intake derived from  
 222 food tended to be lower in subjects with PPD than in those without PPD, but this result  
 223 was not significant ( $771.9 \pm 188.9$  in subjects with PPP  $\geq 0.3$  and  $844.3 \pm 224.5$  in  
 224 subjects with PPP  $< 0.3$ , and  $803.7 \pm 188.5$  in MPS-positive subjects and  $851.4 \pm 254.4$

225 mL/day/1000kcal in MPS-negative subjects). Dietary fiber intake also tended to be  
 226 lower in subjects with  $PPP \geq 0.3$  than in those with  $PPP < 0.3$ , but this difference was  
 227 not significant. Constipation had no effect as an additional confounder (data not shown).

228

229 **Table 3. Nutritional traits adjusted for age and sex effects in older adults living**  
 230 **with prodromal phase of PD evaluated with PPC or MPS**

|                                           | Prodromal PD probability |                       |         | Mild parkinsonian sign |                       |         |
|-------------------------------------------|--------------------------|-----------------------|---------|------------------------|-----------------------|---------|
|                                           | $\geq 0.3$               | $< 0.3$               | P value | Positive               | Negative              | P value |
| Total energy intake, kcal/day             | 1860.9<br>$\pm$ 312.7    | 1911.5<br>$\pm$ 430.3 | 0.748   | 1817.5<br>$\pm$ 384.7  | 1933.7<br>$\pm$ 433.7 | 0.012   |
| Fat intake, g/1000 kcal/day               | 33.4 $\pm$<br>8.8        | 29.3 $\pm$<br>6.7     | 0.037   | 29.3 $\pm$<br>6.0      | 29.9 $\pm$<br>6.2     | 0.656   |
| Carbohydrate intake, g/1000 kcal/day      | 121.4 $\pm$<br>19.0      | 132.1 $\pm$<br>17.7   | 0.039   | 134.9 $\pm$<br>15.2    | 130.8 $\pm$<br>18.4   | 0.085   |
| Protein intake, g/1000 kcal/day           | 39.4 $\pm$<br>8.8        | 39.3 $\pm$<br>6.7     | 0.906   | 38.5 $\pm$<br>5.2      | 39.5 $\pm$<br>7.1     | 0.263   |
| Vitamin B1 intake, mg/1000 kcal/day       | 0.5 $\pm$<br>0.1         | 0.5 $\pm$<br>0.1      | 1.000   | 0.5 $\pm$<br>0.1       | 0.5 $\pm$<br>0.1      | 0.257   |
| Vitamin B2 intake, mg/1000 kcal/day       | 0.7 $\pm$<br>0.2         | 0.7 $\pm$<br>0.2      | 0.888   | 0.7 $\pm$<br>0.1       | 0.7 $\pm$<br>0.2      | 0.235   |
| Vitamin B6 intake, mg/1000 kcal/day       | 2.0 $\pm$<br>0.9         | 1.9 $\pm$<br>0.7      | 0.667   | 1.9 $\pm$<br>0.6       | 1.9 $\pm$<br>0.7      | 0.535   |
| Vitamin B12 intake, $\mu$ g/1000 kcal/day | 4.4 $\pm$<br>2.3         | 4.1 $\pm$<br>1.6      | 0.539   | 4.0 $\pm$<br>1.3       | 4.1 $\pm$<br>1.7      | 0.319   |
| Water intake (food), g/1000 kcal/day      | 771.9 $\pm$<br>188.9     | 844.3 $\pm$<br>224.5  | 0.290   | 803.7 $\pm$<br>188.5   | 851.4 $\pm$<br>254.4  | 0.307   |
| Fiber intake, g/1000 kcal/day             | 8.0 $\pm$<br>2.6         | 8.5 $\pm$ 2.4         | 0.398   | 8.4 $\pm$<br>2.1       | 8.5 $\pm$ 2.5         | 0.753   |

231 PPC, prodromal Parkinson's disease criteria; MPS, mild parkinsonian sign; PD,  
 232 Parkinson's disease; SD, standard deviation; all values are expressed as mean  $\pm$   
 233 standard deviation.

234

235

## 236 **Association between prodromal PD criteria and MPS criteria**

237 As shown in Figure 1, there were four subjects with  $PPP \geq 0.3$  in the MPS-  
238 positive group (6.3%) and eight in the MPS-negative group (3.3%). Mean PPP values  
239 were 0.066 in the MPS-positive group and 0.047 in the MPS-negative group. There  
240 were no significant differences between the two groups in subject number or mean  
241 values ( $p=0.281$  and  $p=0.148$ , respectively). A comparison of prodrome frequencies  
242 between MPS-positive and -negative subjects is shown in Figure 2; the non-use of  
243 caffeine was significantly more common in the MPS-positive group than in the MPS-  
244 negative group (40.7% vs. 19.4%,  $p<0.001$ ). However, no other differences were  
245 observed.

246

247 **Fig 1. Association between PPP and MPS.** The figure shows PPP values when divided  
248 between two groups with and without MPS. Mean value of PPP was not significantly  
249 different between two groups (0.066 vs 0.047,  $p=0.140$ ). Dashed line means  $PPP = 0.3$ .

250 PPP, probability of prodromal Parkinson's disease; MPS, mild parkinsonian sign

251

252 **Fig 2. Prodrome features between MPS-positive and -negative older adults.**

253 Frequencies of each prodromal item are shown in two groups (MPS positive or MPS  
254 negative). The frequency of nonuse of caffeine was significantly higher in the MPS-  
255 positive group ( $p<0.01$ ). MPS, mild parkinsonian sign.

256

257

## 258 **Discussion**

259           The current community-based cross-sectional study revealed differences in  
260 nutritional traits between older individuals with and without PPD. These differences  
261 were especially pronounced when older adults were evaluated using the PPQ (based on  
262 the PPC). Older adults with  $PPP \geq 0.3$  exhibited a unique nutritional trait of a higher  
263 daily intake of fat and a lower daily intake of carbohydrate compared with those with  
264  $PPP < 0.3$ . Moreover, in older adults with positive MPS, a lower total daily energy  
265 intake was identified. Because individuals with PPD are a high-risk population for  
266 developing PD, the characterization of nutritional traits in PPD in the present study is  
267 considered very important. Nutritional intervention in daily diets may contribute to  
268 reducing the incidence of PPD, and thus possibly the incidence of PD.

269           The association between PD development and lipid intake is controversial, as  
270 reported in several previous studies [22,23]. Several negative effects of lipid intake have  
271 been described in relation to PD pathogenesis, such as effects on  $\alpha$ -synuclein  
272 aggregation, oxidative stress, and inflammatory cytokines. Moreover, a previous meta-  
273 analysis demonstrated that a high intake of animal fat (arachidonic acid and cholesterol)  
274 increases PD risk, whereas a high polyunsaturated fatty acid intake decreases the risk  
275 [24]. Although elevated cholesterol levels cause oxidative stress and mitochondrial  
276 dysfunction [25], positive effects of lipids have also been described. For example,  
277 because polyunsaturated fatty acids are present in neuronal cell membranes, fat intake  
278 may have a protective effect on neuronal cells. Thus, lower lipid intake may accelerate  
279 the development of PD.

280           There have been few reports of carbohydrate or total energy intake in relation to  
281 PD. A meta-analysis reported no independent associations between the dietary intake of  
282 carbohydrates or total energy and PD risk [26]. However, it remains unclear whether  
283 nutritional status before the beginning of the disease process of PD may be associated  
284 with disease development. Nonetheless, the influence of nutritional status on motor  
285 function is greater in older adults than in young adults. Thus, because a motor function  
286 decline in older adults increases the risk for reduced activities of daily living and quality  
287 of life (whether or not PD eventually develops), adequate nutritional management  
288 should be recommended, at least from the perspective of general wellbeing.  
289 Furthermore, the impact of nutritional status on PD development should be further  
290 investigated, and prospective studies should be conducted that integrate nutrients into  
291 the research criteria.

292           Different definitions of MPS have been reported previously [27]. In the present  
293 study, we chose to use the criteria reported by Louis et al. [2]] to avoid confusion with  
294 the PPC and because we wanted our findings to be comparable with those of a previous  
295 study [28]. The MPS positivity rate among community-dwelling older adults was 21.0%  
296 in the current study, which was approximately five times higher than the rate of PPD  
297 when estimated using  $PPP \geq 0.3$ . Similarly, a previous study from Japan reported a  
298 prevalence of MPS positivity of 22.1% in community-dwelling older adults aged 60  
299 years and older [28], and a systematic review has reported prevalence rates of MPS  
300 positivity as 4%–46% [16]. The results of the present study are therefore comparable to  
301 previous studies and support their results. In our previous investigation [17], the crude  
302 prevalence of PPD using  $PPP \geq 0.3$  was 5034.5/100,000 (5.0%) community-dwelling

303 older adults. Together with the current finding of a PPD prevalence of 3.9% in older  
304 adults using  $PPP \geq 0.3$ , it is therefore likely that the MPS criteria detect a broader  
305 population of candidates for PPD in community-dwelling older adults than when  $PPP \geq$   
306  $0.3$  is used. Indeed, in the present study, the numbers of older adults with  $PPP \geq 0.3$  or  $<$   
307  $0.3$  were not different between MPS-positive and -negative older adults. Furthermore,  
308 although there were no differences in age between subjects with  $PPP \geq 0.3$  and  $< 0.3$ ,  
309 MPS-positive subjects were significantly older than MPS-negative subjects. Together,  
310 these findings support the idea that MPS criteria are relatively unspecific in older adults  
311 [29].

312 We have previously reported the characteristics of PD prodromes in community-  
313 dwelling older adults with  $PPP \geq 0.3$  [17]. In the current study, however, there were no  
314 significant differences in PD prodromes between subjects with  $PPP \geq 0.3$  and  $< 0.3$ .  
315 One reason for these different results may be the relatively small number of older adults  
316 with  $PPP \geq 0.3$ . By contrast, MPS positivity in older adults was associated with caffeine  
317 non-intake. Although caffeine intake is a well-known protective factor for PD onset [30],  
318 there is no previous evidence of its association with MPS.

319 The present study has several limitations. First, it was a single-center study that  
320 was limited to a cohort of Japanese subjects. Second, the PPQ needs to be further  
321 improved for its future intensive research use. Third, the number of subjects with  $PPP \geq$   
322  $0.3$  was relatively small. Finally, the cohort format (where subjects were required to  
323 come to the screening site) may have created a selection bias because many of the  
324 subjects who underwent screening were likely relatively healthy.

325



## 326 **Conclusions**

327           In the present community-based cross-sectional study, nutritional traits differed  
328 between older individuals with and without PPD. When older adults were evaluated  
329 using the PPQ (based on the PPC), those with  $PPP \geq 0.3$  exhibited a higher daily intake  
330 of fat and a lower daily intake of carbohydrates than those with  $PPP < 0.3$ . The  
331 characterization of nutritional traits in older adults is considered very important because  
332 nutritional intervention in daily diets may reduce the incidence of PD.  
333

335

336 **Acknowledgments**

337 We thank Ms. Kanako Abe for general study support. We also thank Bronwen  
338 Gardner, PhD, from Edanz (<https://jp.edanz.com/ac>) for editing a draft of this  
339 manuscript.

340

341 **References**

- 342 [1] Wirdefeldt K, Adami H-O, Cole P, Trichopoulos D, Mandel J, Wirdefeldt K, et al.  
343 Epidemiology and etiology of Parkinson's disease: a review of the evidence.  
344 European Journal of Epidemiology 2011 26:1 2011;26:1–58.  
345 <https://dx.doi.org/10.1007/s10654-011-9581-6>.
- 346 [2] Dorsey ER, Bloem BR. The Parkinson Pandemic—A Call to Action. JAMA  
347 Neurol 2018;75:9–10. <https://dx.doi.org/10.1001/JAMANEUROL.2017.3299>.
- 348 [3] Lang AE, Siderowf AD, Macklin EA, Poewe W, Brooks DJ, Fernandez HH, et al.  
349 Trial of Cinpanemab in Early Parkinson's Disease. New England Journal of  
350 Medicine 2022;387:408–20. <https://dx.doi.org/10.1056/NEJMoa2203395>.
- 351 [4] Pagano G, Taylor KI, Anzures-Cabrera J, Marchesi M, Simuni T, Marek K, et al.  
352 Trial of Prasinezumab in Early-Stage Parkinson's Disease. New England Journal  
353 of Medicine 2022;387:421–32. <https://doi.org/10.1056/NEJMoa2202867>.
- 354 [5] Fearnley JM, Lees AJ. AGEING AND PARKINSON'S DISEASE:  
355 SUBSTANTIA NIGRA REGIONAL SELECTIVITY. Brain 1991;114:2283–301.  
356 <https://doi.org/10.1093/BRAIN/114.5.2283>.

- 357 [6] Boulos C, Yaghi N, Hayeck R El, Heraoui GNHA, Fakhoury-Sayegh N.  
358 Nutritional Risk Factors, Microbiota and Parkinson's Disease: What Is the  
359 Current Evidence? *Nutrients* 2019;11. <https://doi.org/10.3390/NU11081896>.
- 360 [7] Knight E, Geetha T, Burnett D, Babu JR. The Role of Diet and Dietary Patterns  
361 in Parkinson's Disease. *Nutrients* 2022, Vol 14, Page 4472 2022;14:4472.  
362 <https://doi.org/10.3390/NU14214472>.
- 363 [8] Maraki MI, Yannakoulia M, Xiomerisiou G, Stefanis L, Charisis S, Giagkou N,  
364 et al. Mediterranean diet is associated with a lower probability of prodromal  
365 Parkinson's disease and risk for Parkinson's disease/dementia with Lewy bodies:  
366 A longitudinal study. *Eur J Neurol* 2023. <https://doi.org/10.1111/ENE.15698>.
- 367 [9] Svensson E, Horváth-Puhó E, Thomsen RW, Djurhuus JC, Pedersen L,  
368 Borghammer P, et al. Vagotomy and subsequent risk of Parkinson's disease. *Ann*  
369 *Neurol* 2015;78:522–9. <https://doi.org/10.1002/ANA.24448>.
- 370 [10] Villumsen M, Aznar S, Pakkenberg B, Jess T, Brudek T. Inflammatory bowel  
371 disease increases the risk of Parkinson's disease: a Danish nationwide cohort  
372 study 1977–2014. *Gut* 2019;68:18–24. [https://doi.org/10.1136/GUTJNL-2017-](https://doi.org/10.1136/GUTJNL-2017-315666)  
373 [315666](https://doi.org/10.1136/GUTJNL-2017-315666).
- 374 [11] Nishiwaki H, Ito M, Ishida T, Hamaguchi T, Maeda T, Kashihara K, et al. Meta-  
375 Analysis of Gut Dysbiosis in Parkinson's Disease. *Movement Disorders*  
376 2020;35:1626–35. <https://doi.org/10.1002/MDS.28119>.
- 377 [12] Takahashi K, Nishiwaki H, Ito M, Iwaoka K, Takahashi K, Suzuki Y, et al.  
378 Altered gut microbiota in Parkinson's disease patients with motor complications.

- 379            Parkinsonism Relat Disord 2022;95:11–7.  
380            <https://doi.org/10.1016/J.PARKRELDIS.2021.12.012>.
- 381    [13]    Heinzl S, Berg D, Gasser T, Chen H, Yao C, Postuma RB, et al. Update of the  
382            MDS research criteria for prodromal Parkinson’s disease. *Movement Disorders*  
383            2019;34:1464–70. <https://doi.org/10.1002/MDS.27802>.
- 384    [14]    Postuma RB, Lang AE, Gagnon JF, Pelletier A, Montplaisir JY. How does  
385            parkinsonism start? Prodromal parkinsonism motor changes in idiopathic REM  
386            sleep behaviour disorder. *Brain* 2012;135:1860–70.  
387            <https://doi.org/10.1093/BRAIN/AWS093>.
- 388    [15]    Avenali M, Toffoli M, Mullin S, McNeil A, Hughes DA, Mehta A, et al.  
389            Evolution of prodromal parkinsonian features in a cohort of GBA mutation-  
390            positive individuals: a 6-year longitudinal study. *J Neurol Neurosurg Psychiatry*  
391            2019;90:1091–7. <https://doi.org/10.1136/JNNP-2019-320394>.
- 392    [16]    Buchanan SM, Richards M, Schott JM, Schrag A. Mild Parkinsonian Signs: A  
393            Systematic Review of Clinical, Imaging, and Pathological Associations.  
394            *Movement Disorders* 2021;36:2481–93. <https://doi.org/10.1002/MDS.28777>.
- 395    [17]    Taguchi K, Iwaoka K, Yamaguchi T, Nozaki R, Sato Y, Terauchi T, et al. A  
396            cross-sectional study of Parkinson’s disease and the prodromal phase in  
397            community-dwelling older adults in eastern Japan. *Clin Park Relat Disord*  
398            2022;7:100147. <https://doi.org/10.1016/J.PRDOA.2022.100147>.
- 399    [18]    Ninomiya T, Nakaji S, Maeda T, Yamada M, Mimura M, Nakashima K, et al.  
400            Study design and baseline characteristics of a population-based prospective  
401            cohort study of dementia in Japan: the Japan Prospective Studies Collaboration

- 402 for Aging and Dementia (JPSC-AD). *Environ Health Prev Med* 2020;25:1–12.
- 403 <https://doi.org/10.1186/S12199-020-00903-3>.
- 404 [19] K. Taguchi, K. Iwaoka, R. Nozaki, T. Yamaguchi, Y. Suzuki, K. Takahashi, et al.
- 405 Prodromes and Probability in People Living with Parkinson’s Disease: a
- 406 retrospective study. *J Mov Disord Disabil* 2021;31:1–11.
- 407 [20] Louis ED, Tang MX, Schupf N, Mayeux R. Functional Correlates and Prevalence
- 408 of Mild Parkinsonian Signs in a Community Population of Older People. *Arch*
- 409 *Neurol* 2005;62:297–302. <https://doi.org/10.1001/ARCHNEUR.62.2.297>.
- 410 [21] Ministry of Education Culture, Sports, Science and Technology - JAPAN. The
- 411 Standard Tables of Food Composition in Japan -2015- (seventh revised version)
- 412 [cited 2015]. Available from:
- 413 [https://www.mext.go.jp/en/policy/science\\_technology/policy/title01/detail01/137](https://www.mext.go.jp/en/policy/science_technology/policy/title01/detail01/1374030.htm)
- 414 [4030.htm](https://www.mext.go.jp/en/policy/science_technology/policy/title01/detail01/1374030.htm).
- 415 [22] Kamel F, Goldman SM, Umbach DM, Chen H, Richardson G, Barber MR, et al.
- 416 Dietary Fat Intake, Pesticide Use, and Parkinson’s Disease. *Parkinsonism Relat*
- 417 *Disord* 2014;20:82. <https://doi.org/10.1016/J.PARKRELDIS.2013.09.023>.
- 418 [23] Zhang Y, Chen J, Qiu J, Li Y, Wang J, Jiao J. Intakes of fish and polyunsaturated
- 419 fatty acids and mild-to-severe cognitive impairment risks: a dose-response meta-
- 420 analysis of 21 cohort studies–. *Am J Clin Nutr* 2016;103:330–40.
- 421 <https://doi.org/10.3945/AJCN.115.124081>.
- 422 [24] De Lau LML, Bornebroek M, Witteman JCM, Hofman A, Koudstaal PJ, Breteler
- 423 MMB. Dietary fatty acids and the risk of Parkinson disease. *Neurology*
- 424 2005;64:2040–5. <https://doi.org/10.1212/01.WNL.0000166038.67153.9F>.

- 425 [25] Qu Y, Chen X, Xu MM, Sun Q. Relationship between high dietary fat intake and  
426 Parkinson's disease risk: a meta-analysis. *Neural Regen Res* 2019;14:2156.  
427 <https://doi.org/10.4103/1673-5374.262599>.
- 428 [26] Wang A, Lin Y, Wu Y, Zhang D. Macronutrients intake and risk of Parkinson's  
429 disease: A meta-analysis. *Geriatr Gerontol Int* 2015;15:606–16.  
430 <https://doi.org/10.1111/GGI.12321>.
- 431 [27] Algotsson C, Rosso A, Elmståhl S, Siennicki-Lantz A. Prevalence and functional  
432 impact of parkinsonian signs in older adults from the Good Aging in Skåne study.  
433 *Parkinsonism Relat Disord* 2023;111:105416.  
434 <https://doi.org/10.1016/J.PARKRELDIS.2023.105416>.
- 435 [28] Uemura Y, Wada-Isoe K, Nakashita S, Nakashima K. Mild parkinsonian signs in  
436 a community-dwelling elderly population sample in Japan. *J Neurol Sci*  
437 2011;304:61–6. <https://doi.org/10.1016/J.JNS.2011.02.013>.
- 438 [29] Keezer MR, Wolfson C, Postuma RB. Age, Gender, Comorbidity, and the MDS-  
439 UPDRS: Results from a Population-Based Study. *Neuroepidemiology*  
440 2016;46:222–7. <https://doi.org/10.1159/000444021>.
- 441 [30] Hong CT, Chan L, Bai CH. The Effect of Caffeine on the Risk and Progression  
442 of Parkinson's Disease: A Meta-Analysis. *Nutrients* 2020;12:1–12.  
443 <https://doi.org/10.3390/NU12061860>.  
444  
445

Figure 1. Association between PPP and MPS

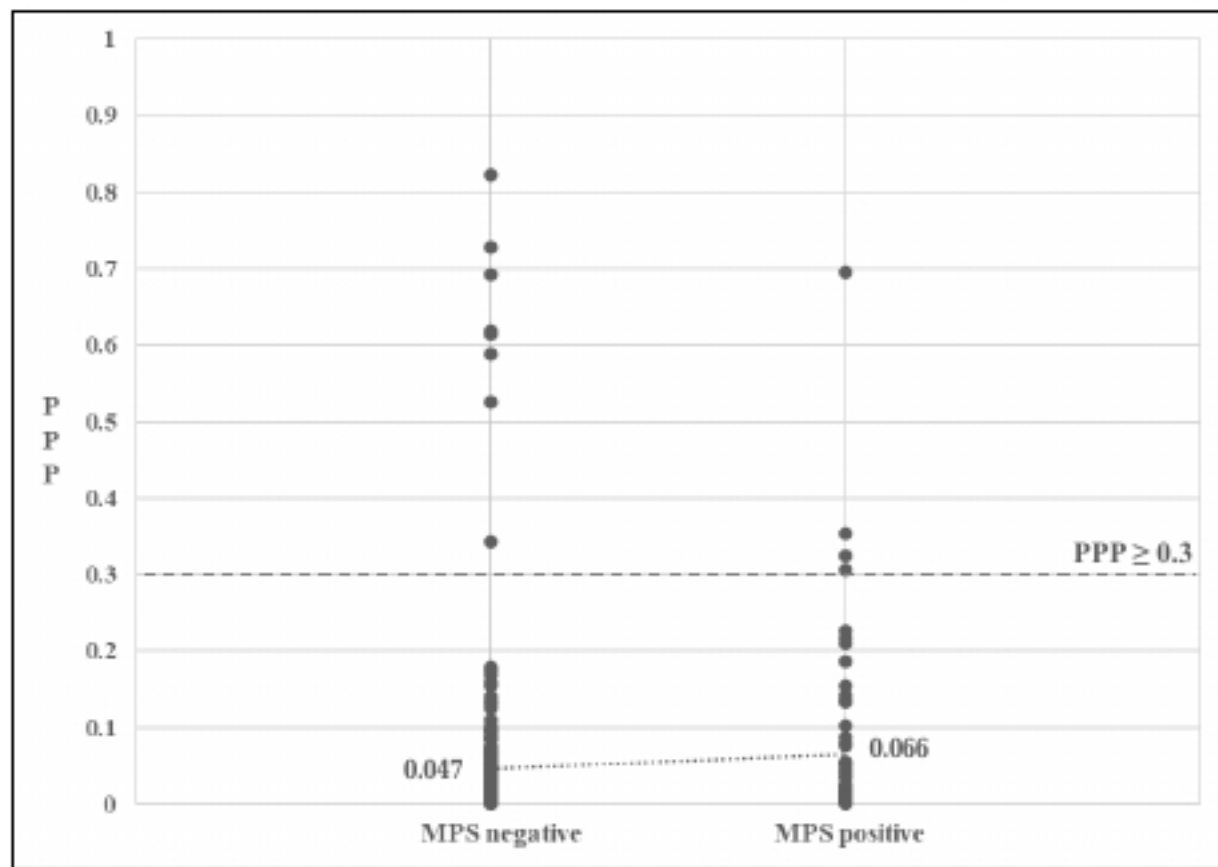

Figure1

**Figure 2. Prodrome features between MPS positive and negative older adults**

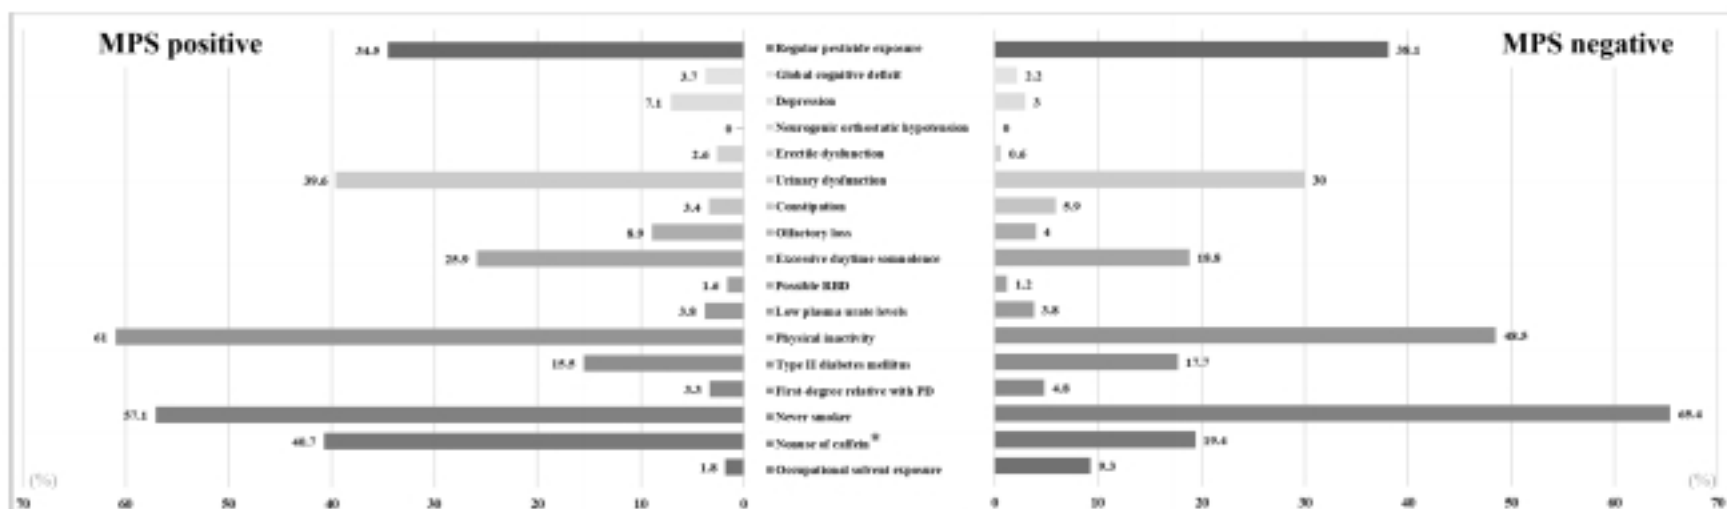

Figure2
